# Supplementary material for: Evaluating mate encounter and walking dispersal dynamics of termites using posture tracking and behavioral simulation
Source: Research Square preprint supplement (doi:10.21203/rs.3.rs-6837416/v1), 2025-06-12
Supplement: Supplementary file 1 [file bbd8f77eb705c7b484b52285.pdf]

Supplement materials for

**Evaluating mate encounter and walking dispersal dynamics of termites using posture tracking and behavioral simulation**

**Nobuaki Mizumoto**

Department of Entomology & Plant Pathology, Auburn University, Auburn, AL, 36849, USA

[nzm0095@auburn.edu](mailto:nzm0095@auburn.edu)

**Figure S1-S4**

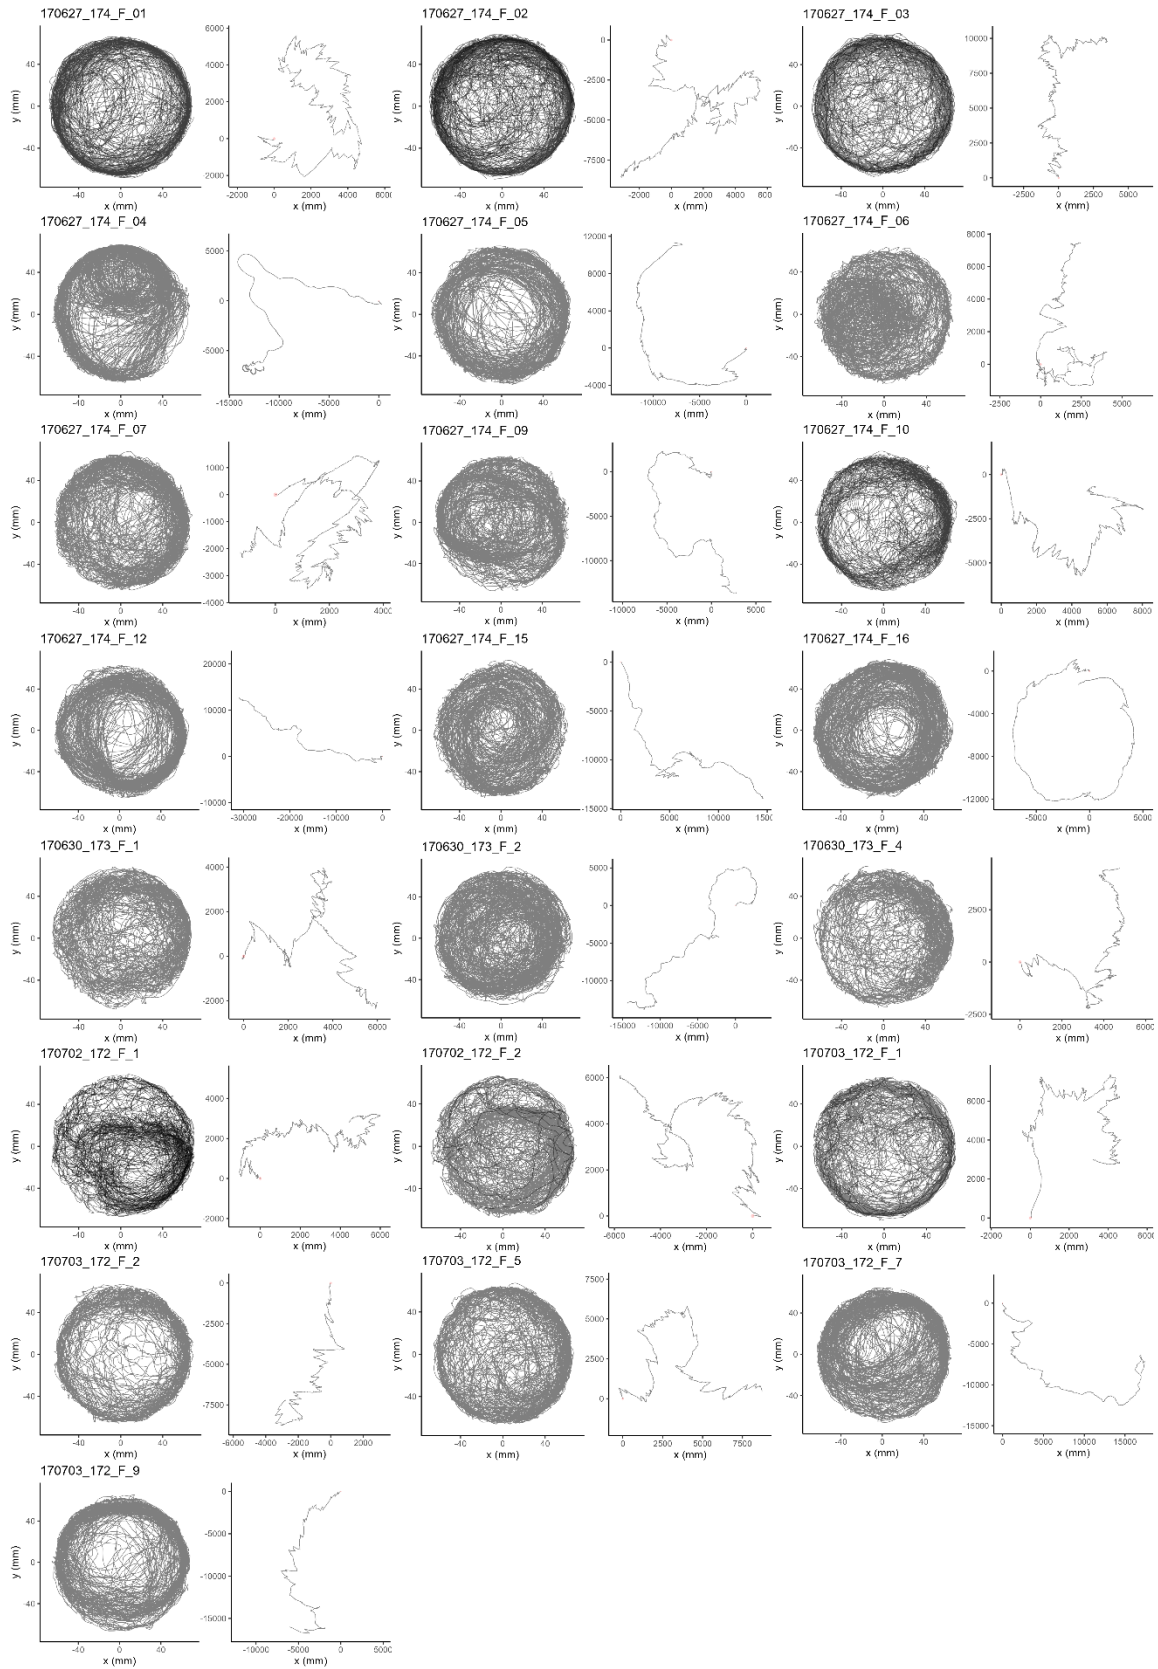

**Figure S1.** Original and unwrapped trajectories of single females.

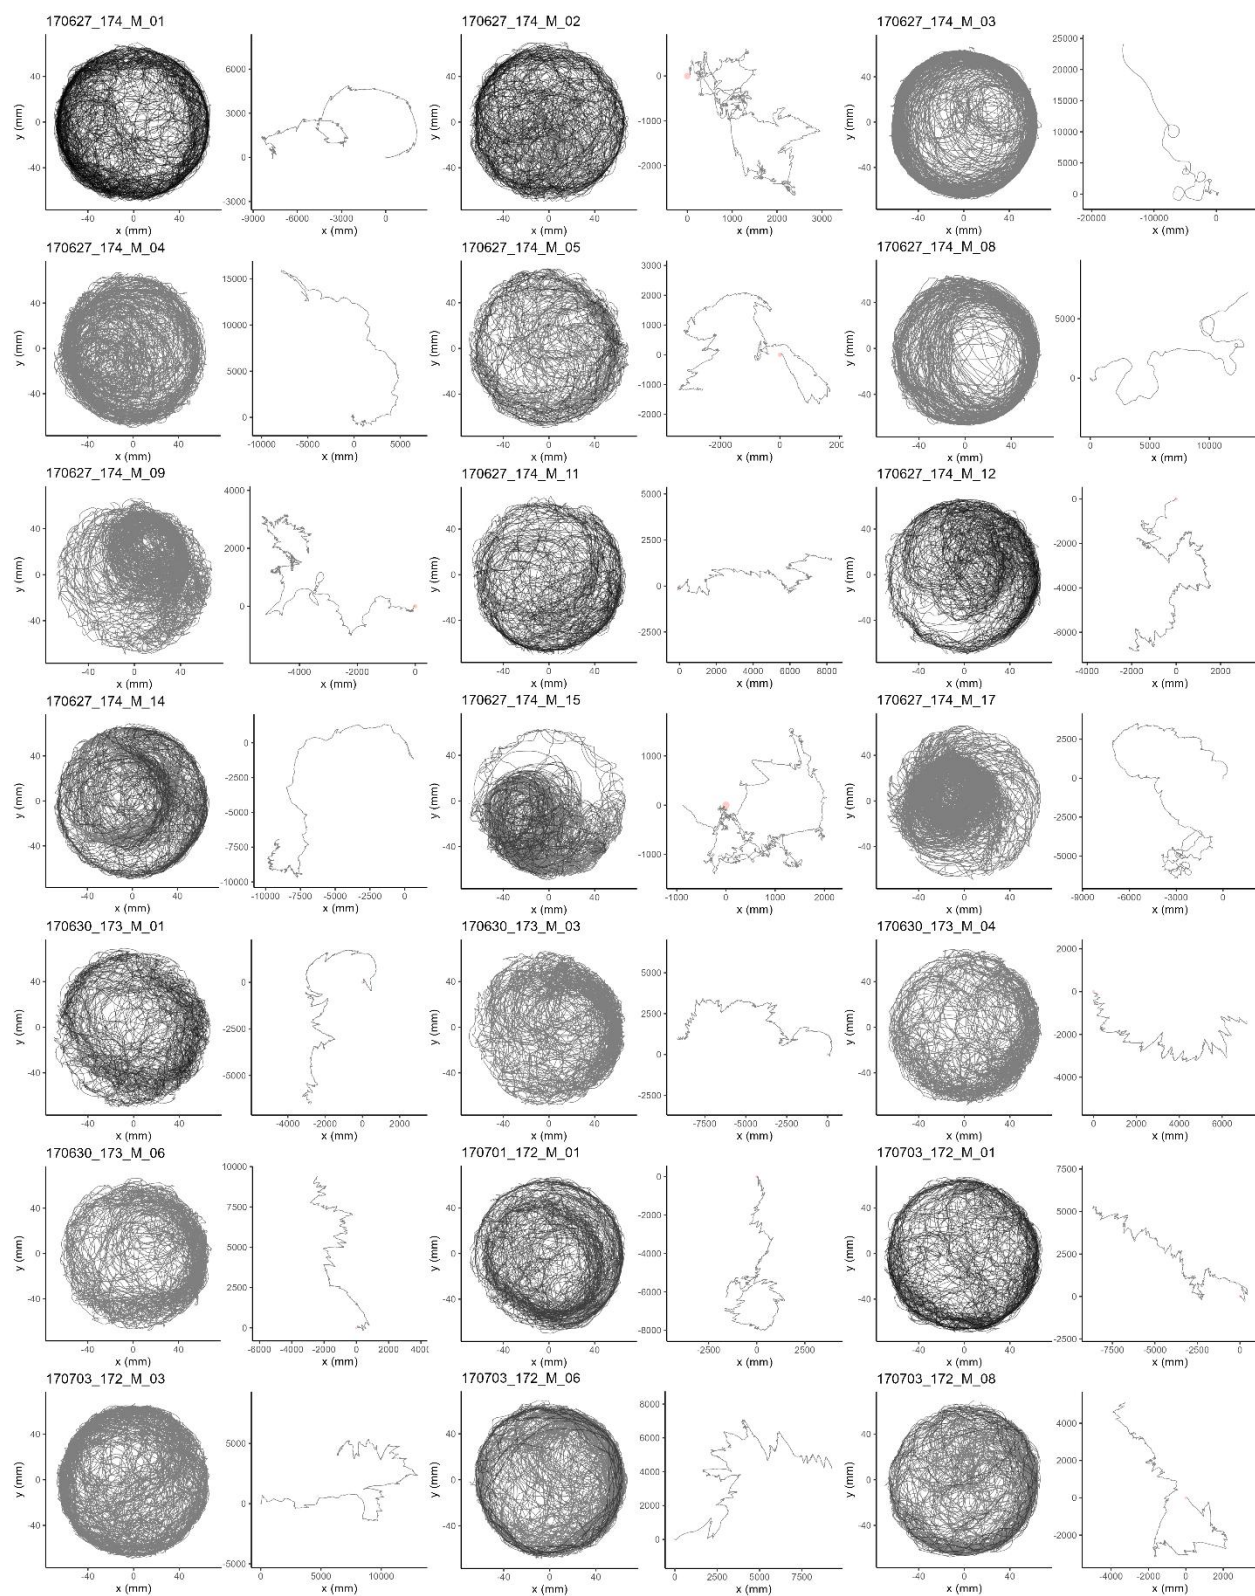

**Figure S2.** Original and unwrapped trajectories of single males.



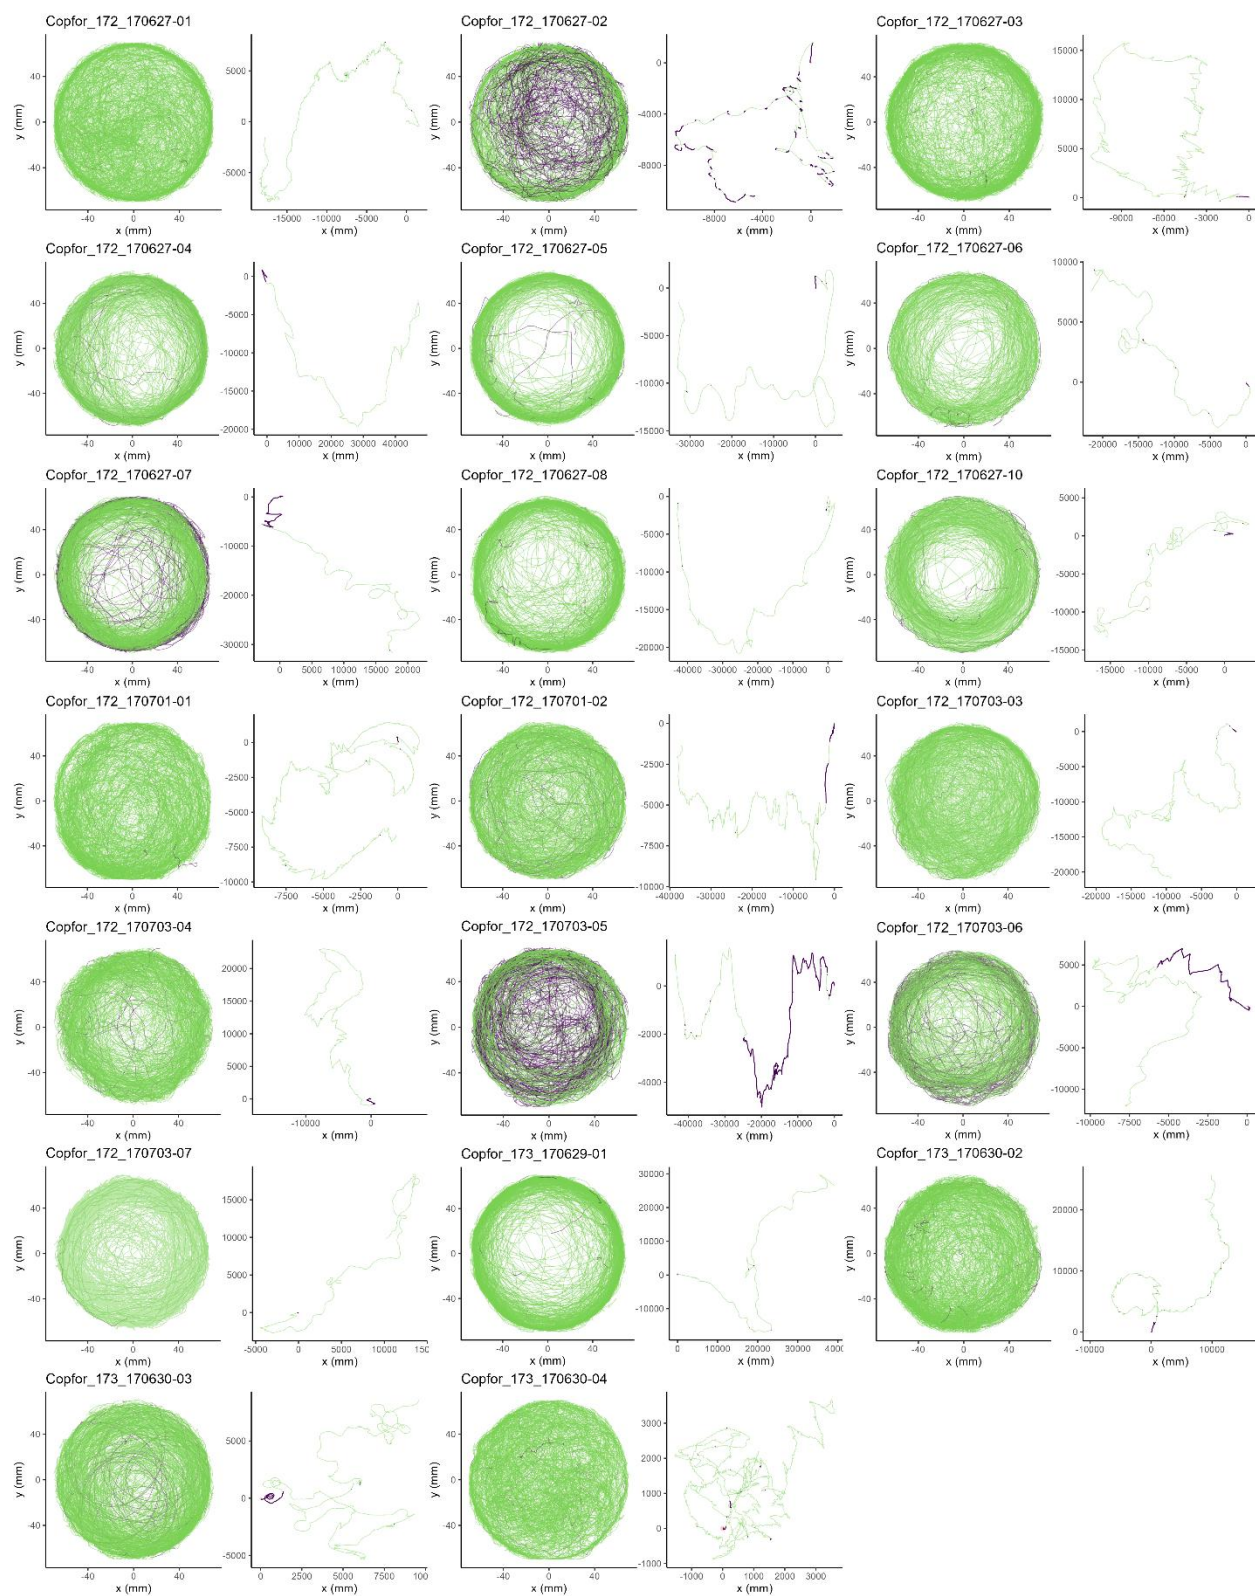

**Figure S3.** Original and unwrapped trajectories of tandem running pairs. Green is for tandem running, while purple is for separation.

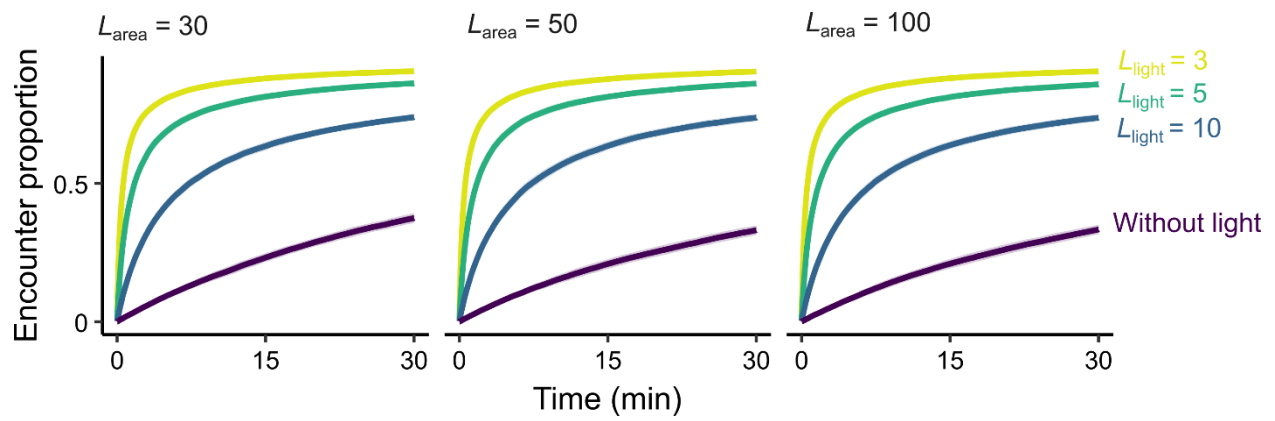

**Figure S4.** The results of the sensitivity analysis of the parameters  $L_{\text{area}}$  and  $L_{\text{light}}$  when  $n = 1,000$ .
